# Supplementary material for: Electrochemically synthesized partially reduced graphene oxide modified glassy carbon electrode for individual and simultaneous voltammetric determination of ascorbic acid, dopamine and uric acid
Source: Royal Society of Chemistry journal article supplement (doi:10.1039/c4ay00043a), 2014-01-01
Supplement: c4ay00043a1.pdf [file c4ay00043a1.pdf]

**Electrochemically synthesized partially reduced graphene oxide modified glassy carbon electrode for individual and simultaneous voltammetric determination of ascorbic acid, dopamine and uric acid**

Padamadathil K. Aneesh, Sindhu R. Nambiar, Talasila P. Rao\*, Ayyappanpillai Ajayaghosh

**Supporting information**

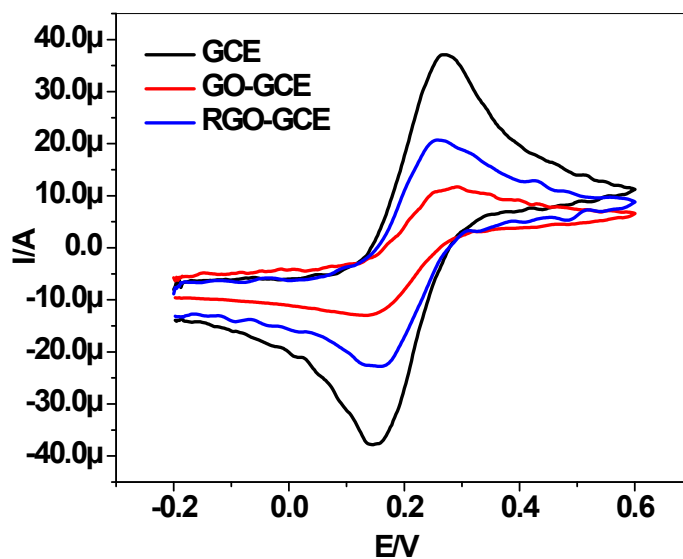

**Fig. S1:** Cyclic voltammetric response of  $5 \times 10^{-3}$  M of  $K_3[Fe(CN)_6]$  in  $1 \times 10^{-1}$  M KCl at bare GCE, GO-GCE and RGO-GCE modified electrodes at scan rate of  $50 \text{ mVs}^{-1}$

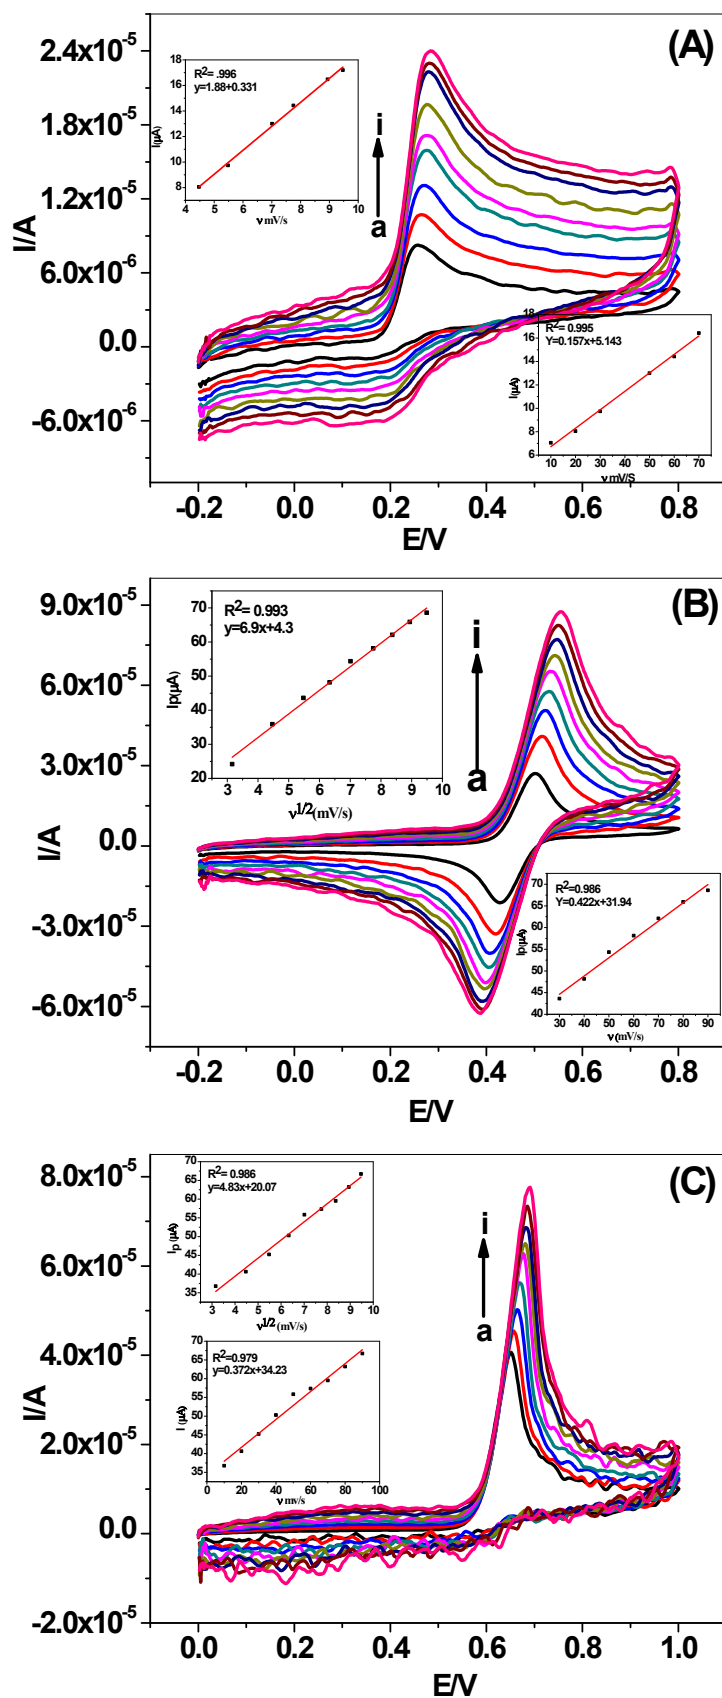

**Fig. S2 (A, B andC):** Cyclic voltammograms of  $1 \times 10^{-3}$  Mof AA, DA and UA at various scan rates (10 to  $90 \text{ mVs}^{-1}$ ) at RGO-GCE, Insets: corresponding  $I_p$  vs  $v^{1/2}$  and  $I_p$  vs  $v$  plots.

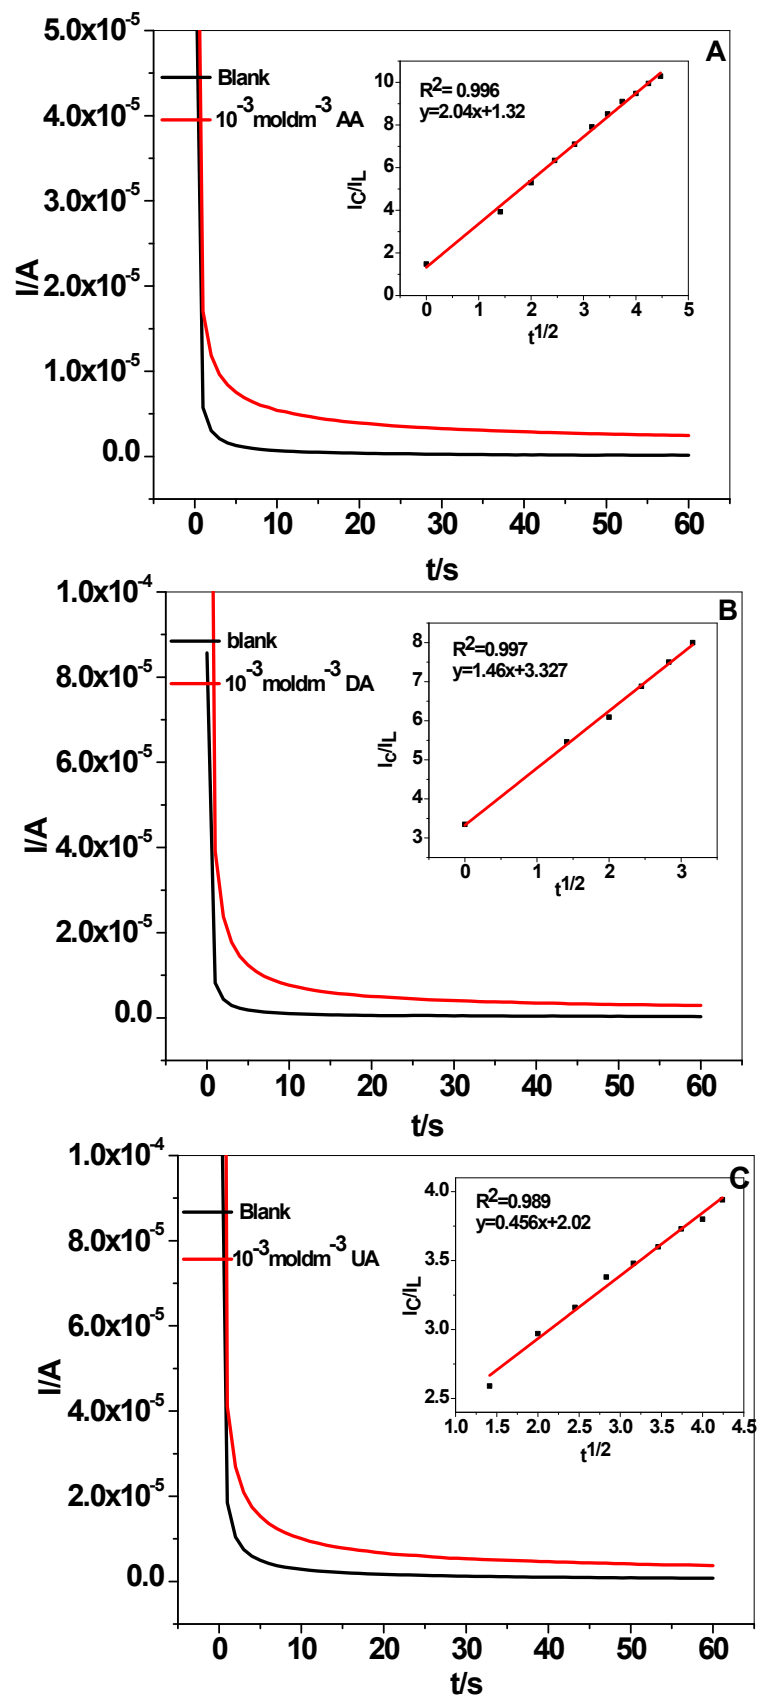

**Fig. S3 (A, B &C):** Current-time curves of RGO-GCE in the absence and presence of  $1 \times 10^{-3}$  M of AA, DA and UA, respectively in 0.1M phosphate buffer (pH=3) and inset shows the corresponding dependence of  $I_C/I_L$  on  $t^{1/2}$ .

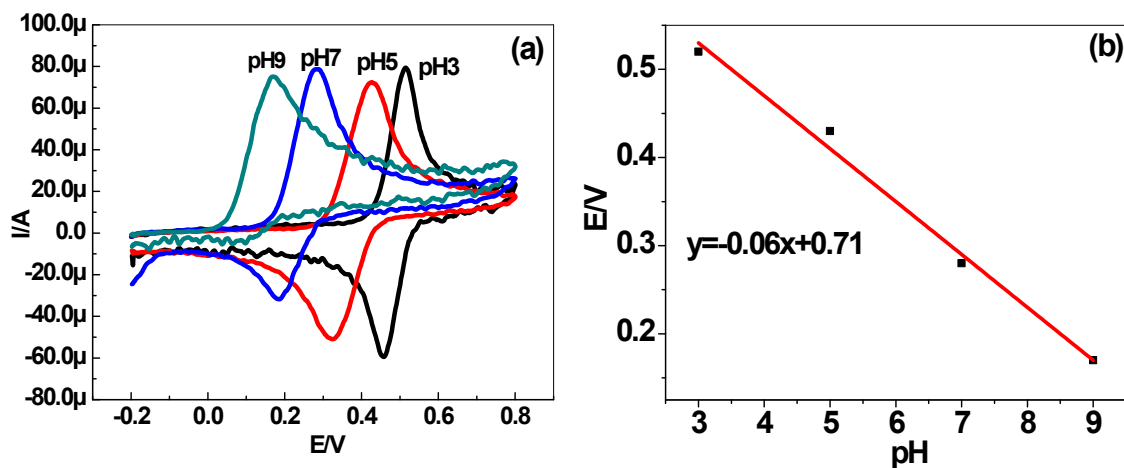

**Fig. S4.** CVs of  $1 \times 10^{-3}$  MDA at the RGO-GCE at different pH's (3.0, 5.0, 7.0 and 9.0) Figure (b) shows the relationship between the peakpotential and pH.

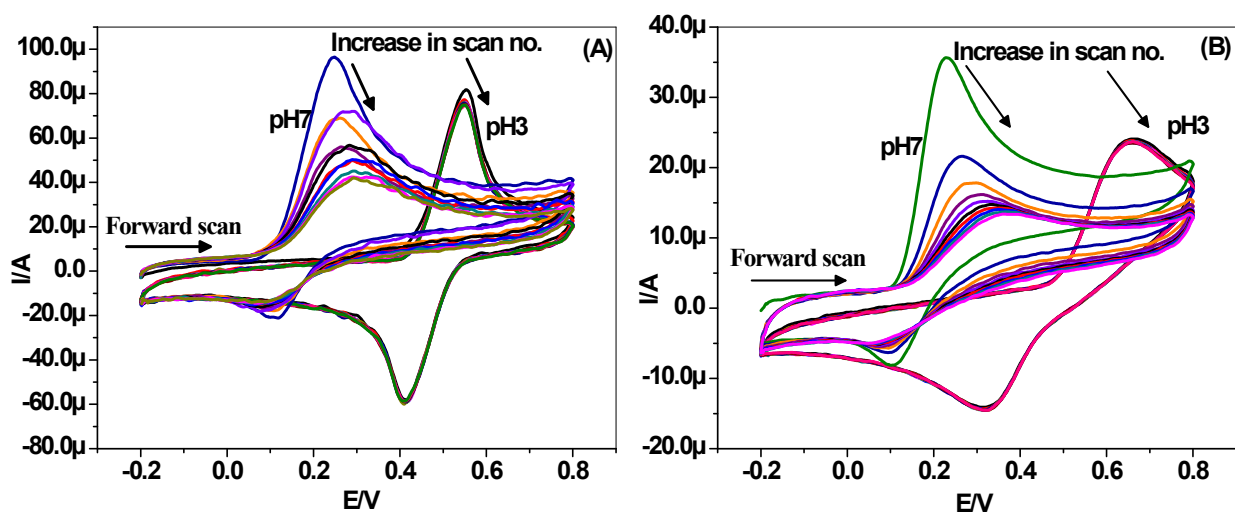

**Fig. S5** Repetitive cycling for the electro-oxidation of  $1 \times 10^{-3}$  M DA in 0.1M phosphate buffer at pH 3.0 & 7.0 (A) RGO-GCE (B) Bare GCE.

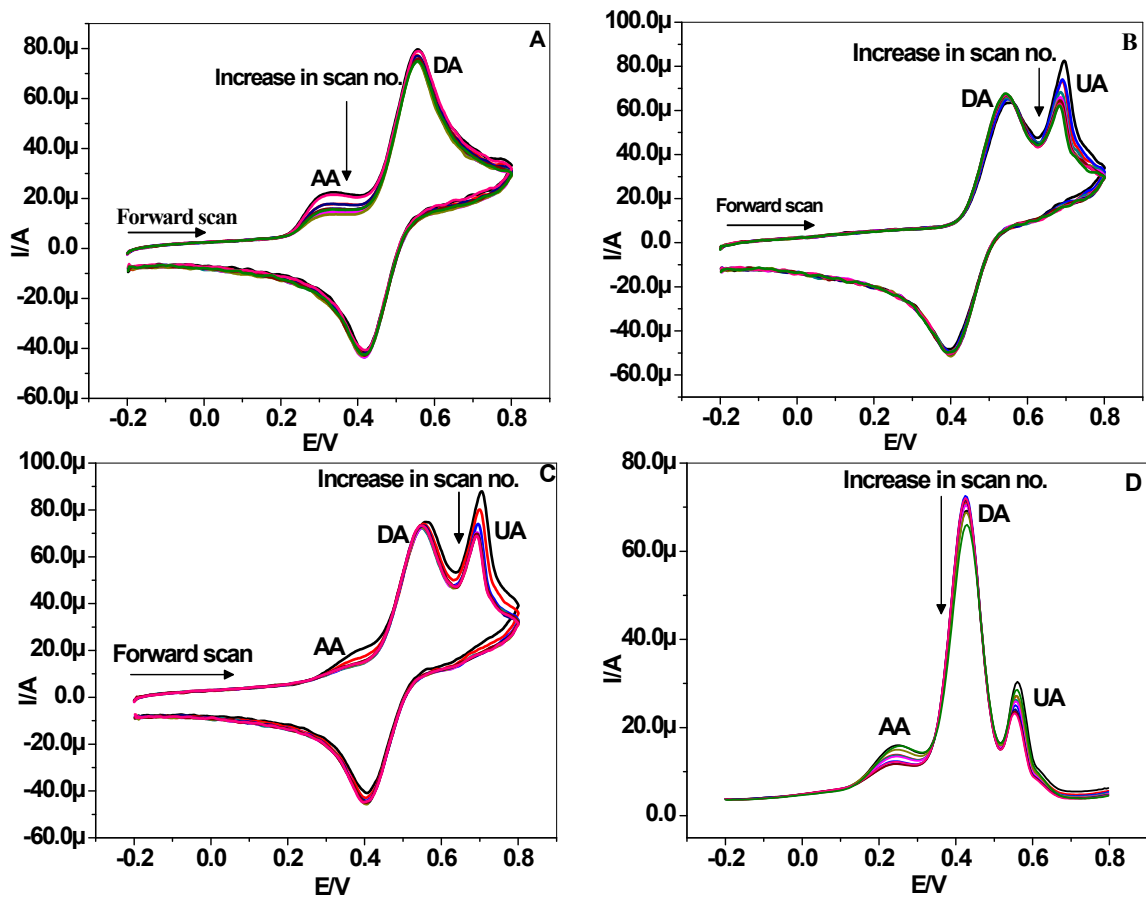

**Fig. S6** Repetitive cycling for the simultaneous electro-oxidation of  $1 \times 10^{-3}$  M of AA, DA and UA in phosphate buffer at pH 3.0 (A, B & C) and corresponding DPV profile (D).

**Table S1:** Comparative account of recently reported electrochemical sensors for individual and simultaneous determination of AA, DA and UA.

| Electrode                        | Linear range (10 <sup>-6</sup> M) |                                          |             | Detection Limit (10 <sup>-6</sup> M) |           |          | References |
|----------------------------------|-----------------------------------|------------------------------------------|-------------|--------------------------------------|-----------|----------|------------|
|                                  | AA                                | DA                                       | UA          | AA                                   | DA        | UA       |            |
| PoPD/E-RGO <sup>a</sup>          | -                                 | 10-800                                   | -           | -                                    | 7.5       | -        | 27         |
| e-FGPE <sup>b</sup>              | 20-400                            | 0.5-35                                   | 0.5-35      | 2                                    | 0.01      | 0.02     | 33         |
| GEF/CFE <sup>c</sup>             | 45.4-1483.2                       | 0.7-45.21                                | 3.78-183.87 | 24.7                                 | 0.5       | 2        | 34         |
| CTAB-GO/MWNT <sup>d</sup>        | 5-300                             | 5-500                                    | 3.0-60      | 1.0                                  | 1.5       | 1.0      | 35         |
| PIlox-GO <sup>e</sup>            | 75-2275                           | 12-278                                   | 3.6-249.6   | 18                                   | 0.63      | 0.59     | 36         |
| IL-G/GCE <sup>f</sup>            | -                                 | 5-275                                    | 1-400       | -                                    | 0.812     | 0.513    | 37         |
| Pt/RGO                           | -                                 | 10-170                                   | 10-130      | -                                    | 0.25      | 0.45     | 38         |
| (Fe3O4-NH2)@(GS) <sup>g</sup>    | 5-1600                            | 0.2-38                                   | 1.0-850     | 0.074                                | 0.126     | 0.056    | 39         |
| ERGO <sup>h</sup>                | 500-2000                          | 0.5-60                                   | 0.5-60      | 250                                  | 0.5       | 0.5      | 40         |
| SDS-MWCNTs/GCE                   | 400-3500                          | 0.8-80                                   | 4-30        | 3                                    | 0.01      | 0.04     | 41         |
| RGO <sup>i</sup>                 | -                                 | -                                        | 0.1-10      | -                                    | -         | 0.05     | 42         |
| PdNPs/GR/CS/GCE <sup>j</sup>     | 100-4000                          | 0.5-200                                  | 0.5-200     | 20                                   | 0.1       | 0.17     | 43         |
| PEDOT-modified Ni/Si MCP         | 20-1400                           | 12-48                                    | 36-216      | 10                                   | 1.5       | 2.7      | 44         |
| Methoxypolyethylene glycols/GCE  | -                                 | 1-140                                    | -           | -                                    | 0.0468    | -        | 45         |
| CPE/GNS <sup>k</sup>             | -                                 | 2-1000                                   | -           | -                                    | 0.85      | -        | 20         |
| TNCs1-GCE                        | 80-1400                           | 0.4-60                                   | 10-70       | 14±0.56                              | 0.28±0.02 | 1.6±0.05 | 46         |
| AuNPs@MIPs                       | -                                 | 0.02-.54                                 | -           | -                                    | 0.0078    | -        | 47         |
| PPy-RGO <sup>l</sup>             | -                                 | 0.06-8                                   | -           | -                                    | 0.006     | -        | 48         |
| BPPG/MWCNT/HQ <sup>m</sup>       | 40-280                            | 0.01-0.07                                | 2-14        | 1.94                                 | 0.003     | 0.1      | 49         |
| SGN/NiPc <sup>n</sup>            | 25-1050                           | 0.25-10                                  | 5.0-175     | 0.12                                 | 0.08      | 0.22     | 50         |
| N-PCNPs <sup>o</sup>             | 80-2000                           | 0.5-30                                   | 4-50        | 0.74                                 | 0.01      | 0.02     | 51         |
| Nano-Cu-PSAIII/GCE <sup>p</sup>  | 0.30-730                          | 0.02-65                                  | 0.25-107    | 0.15                                 | 0.01      | 0.10     | 52         |
| Poly(tyrosine)/MWNT <sup>q</sup> | 50-1000                           | 0.1-30                                   | 1-350       | 2.0                                  | 0.02      | 0.30     | 53         |
| Modified GCE                     | 25-300                            | 3-300                                    | 5-70        | 23.38                                | 2.67      | 4.70     | 54         |
| P-4-ABA/GCE <sup>r</sup>         | 20-800                            | 5.0-100                                  | 1.0-80      | 5.0                                  | 1.0       | 0.5      | 55         |
| DpAu/PTCA-Cyst/GCE <sup>s</sup>  | 20-700                            | 2-402                                    | 0.40-252    | 6.40                                 | 0.67      | 0.12     | 56         |
| Graphene modified electrode      | -                                 | 2.5-100                                  | -           | -                                    | 0.5       | -        | 57         |
| AuNW <sup>t</sup>                | -                                 | 0.2-600                                  | -           | -                                    | 0.026     | -        | 58         |
| NG <sup>u</sup>                  | 5-1300                            | 0.5-170                                  | 0.1-20      | 2.2                                  | 0.25      | 0.045    | 59         |
| PVP/Graphene                     | -                                 | 5×10 <sup>-4</sup> -1.13×10 <sup>3</sup> | -           | -                                    | 0.002     | -        | 60         |
| Cysteamine-Functionalized MWCNT  | -                                 | 0.2-100                                  | 1-100       | -                                    | 0.02      | 0.1      | 61         |

|                      |         |          |         |     |       |     |              |
|----------------------|---------|----------|---------|-----|-------|-----|--------------|
| Pre-treated GCE      | -       | 0.1-12   | -       | -   | 0.03  | -   | 62           |
| N-CNRs <sup>v</sup>  | -       | 0.008-15 | -       | -   | 0.009 | -   | 63           |
| Graphene             | -       | -        | 2-120   | -   | -     | 0.6 | 64           |
| RGO-GCE <sup>w</sup> | 40-1000 | 0.1-100  | 0.8-800 | 4.2 | 0.008 | 0.6 | Present work |

<sup>a</sup> poly(o-phenylenediamine) (PoPD)/E-RGO hybrid composite, <sup>b</sup>Exfoliated flexible graphite paper, <sup>c</sup> Graphene flowers/Carbon fiber, <sup>d</sup> CTAB functionalized graphene oxide/multiwalled carbon nanotube composite, <sup>e</sup>Overoxidized polyimidazole and graphene oxide, <sup>f</sup> Ionic liquid functionalized graphene, <sup>g</sup> amino-group functionalized mesoporous Fe<sub>3</sub>O<sub>4</sub>@graphene sheets, <sup>h</sup> electrochemically reduced graphene oxide, <sup>i</sup> reduced graphene oxide, <sup>j</sup> Palladium nanoparticle/graphene/chitosan/glassy carbon electrode, <sup>k</sup> Carbon paste electrode modified with graphene nanosheet, <sup>l</sup> polypyrrole-reduced graphite oxide core-shell microspheres, <sup>m</sup> basal plane pyrolytic graphite (BPPG) electrode modified with 1,4-naphthoquinone (NQ) adsorbed on multiwalled carbon nanotubes (MWCNT), <sup>n</sup> Nickel(II) phthalocyanine on mesoporous SiO<sub>2</sub>/C carbon ceramic matrices, <sup>o</sup> Nitrogen doped porous carbon nanopolyhedra, <sup>p</sup> Cu nanoparticles (nano-Cu)-poly(sulfonazo III) (PSA III) modified glassy carbon electrode, <sup>q</sup> poly (tyrosine)/carboxyl functionalized multi-walled carbon nanotubes composite film, <sup>r</sup> A polymerized film of 4-aminobutyric acid on the surface of glassy carbon electrode, <sup>s</sup> Deposited gold nanocrystals enhanced porous PTCA-Cys layer, <sup>t</sup> Gold nanowire modified, <sup>u</sup> Nitrogen doped graphene, <sup>v</sup> Nitrogen-doped carbon nanorods, <sup>w</sup> Partially reduced graphene oxide modified GCE.
